# Supplementary material
Source: publisher figshare collection journal article supplement (https://acs.figshare.com/ndownloader/files/5156152)
Supplement: Supplementary file 1 [file 5156152]

**Supporting Information:** Detailed explanation considering the obtaining of the values of the difference in interaction energies of 1) mono- and dianionic arsenate in WT ArsC and 2) dianionic arsenate in WT and Arg16Ala ArsC.

1) The interaction energies of mono- and dianionic arsenate in WT ArsC are given by the energetic difference between the energy of the optimized complex and the optimized, isolated arsenate and non-complexed enzyme. These two interaction energies contain the same, unknown energy of the non-complexed enzyme, which cancels upon comparison.

$$\Delta\Delta E = \Delta E_m - \Delta E_d \quad (1)$$

with  $\Delta E_m$  and  $\Delta E_d$  the binding energy of mono- and dianionic arsenate in WT ArsC, which can be written as

$$\Delta E_m = E_{\text{complex}} - E_{\text{monoanion}} - E_{\text{enzyme}} \quad (2a)$$

$$\Delta E_d = E_{\text{complex}^{\cdot}} - E_{\text{dianion}} - E_{\text{enzyme}} \quad (2b)$$

with  $E_{\text{complex}}$  and  $E_{\text{complex}^{\cdot}}$  the energy of the mono- and dianionic enzyme-substrate complex,  $E_{\text{monoanion}}$  and  $E_{\text{dianion}}$  the energy of the free mono- and dianion in gas phase and  $E_{\text{enzyme}}$  the energy of the non-complexed enzyme.

Since  $E_{\text{enzyme}}$  is equal in Eq. (2a) and Eq. (2b), Eq. (1) can be written as:

$$\Delta\Delta E = E_{\text{complex}} - E_{\text{monoanion}} - (E_{\text{complex}^{\cdot}} - E_{\text{dianion}}) \quad (3)$$

Table 1: Numerical values calculated at the B3LYP/6-31+G\*\* level. The values are given in a. u.

|                         | $E_{complex}$ | $E_{mono-/dianion}$ | $E_{complex} - E_{mono-/dianion}$ |
|-------------------------|---------------|---------------------|-----------------------------------|
| <b><i>Monoanion</i></b> | -5568.468     | -2536.006           | -3032.462                         |
| <b><i>Dianion</i></b>   | -5567.870     | -2535.278           | -3032.592                         |

$$\Delta\Delta E = E_{complex} - E_{monoanion} - (E_{complex} - E_{dianion}) = 0.130 \text{ a. u.} = 81 \text{ kcal/mol}$$

2) When comparing energetics between WT and Arg16Ala ArsC,  $\Delta E_{enzyme}$  does not cancel out. However, interaction energies are calculated using the extracted geometry of the uncomplexed enzyme from the complexed one.

$$\Delta E_d = E_{complex} - E_{dianion} - E_{enzyme} \quad (4)$$

with  $E_{complex}$  the energy of the dianionic enzyme-substrate complex,  $E_{dianion}$  the energy of the free dianion in gas phase and  $E_{enzyme}$  the energy of the non-complexed enzyme with the geometry extracted from the optimized enzyme-substrate complex.

Table 2: Numerical values calculated at the B3LYP/6-31+G\*\* level. The values are given in a. u.

|                      | $E_{complex}$ | $E_{substrate}$ | $E_{enzyme}$ | $\Delta E_d$ |
|----------------------|---------------|-----------------|--------------|--------------|
| <b><i>WT</i></b>     | -5567.870     | -2535.272       | -3032.207    | -0.391       |
| <b><i>R16Ala</i></b> | -5284.400     | -2535.265       | -2748.940    | -0.195       |

$$\Delta\Delta E = \Delta E_{d(WT)} - \Delta E_{d(Arg16Ala)} = -0.196 \text{ a. u.} = -123 \text{ kcal/mol}$$
